# Supplementary material
Source: bioRxiv or medRxiv preprint supplement (https://www.biorxiv.org/highwire/filestream/26902/field_highwire_adjunct_files/2/095349-11.pdf)
Supplement: Supplementary file [file 095349-11.pdf]

| Top promoter[SNPs in top promoter]                    | Linkage | Corrected coexpression score | FDR  |
|-------------------------------------------------------|---------|------------------------------|------|
| p@chr11:16916978..16916996,- [rs11024074]             |         | 0.58                         | 0.29 |
| enhancer@chr7:107939769-107940082 [rs11561991]        |         | 0.49                         | 0.3  |
| p@chr3:27490147..27490174,+ [rs13096477]              |         | 0.43                         | 0.32 |
| p4@SH2B3 [rs739496]                                   |         | 0.36                         | 0.37 |
| p@chr10:63524522..63524527,- [rs1530440]              |         | 0.32                         | 0.37 |
| p@chr6:26104437..26104461,- [rs198851]                |         | 0.31                         | 0.37 |
| p@chr12:90090838..90090842,- [rs12230074, rs11105378] |         | 0.22                         | 0.52 |
| p11@MTHFR [rs13306561]                                |         | 0.21                         | 0.52 |
| p@chr4:81208116..81208130,+ [rs3733336]               |         | 0.14                         | 0.65 |
| p@chr12:112212004..112212016,+ [rs2238151]            |         | 0.1                          | 0.72 |
| p3@NT5C2 [rs11191582]                                 |         | 0.08                         | 0.72 |
| p8@ATXN2 [rs695871]                                   |         | 0.03                         | 0.85 |
| p14@CSK [rs2168519, rs8033381]                        |         | 0.02                         | 0.85 |
| enhancer@chr11:16357706-16357868 [rs12798854]         |         | 0.0                          | 1.0  |
